# Supplementary material for: Stability vs. reactivity: understanding the adsorption properties of Ni3(BTP)2 by experimental and computational methods
Source: Royal Society of Chemistry journal article supplement (doi:10.1039/c3dt32944e), 2013-01-01
Supplement: c3dt32944e.pdf [file c3dt32944e.pdf]

## Electronic Supplementary Information

### Stability vs. Reactivity: Understanding the Adsorption Properties of Ni<sub>3</sub>(BTP)<sub>2</sub> by Experimental and Computational Methods

---

*Greig C. Shearer<sup>a,b</sup>, Valentina Colombo<sup>c,d,e</sup>, Sachin Chavan<sup>a,b</sup>, Elisa Albanese<sup>a</sup>, Bartolomeo Civalleri<sup>a</sup>, Angelo Maspero,<sup>d</sup> Silvia Bordiga<sup>a\*</sup>*

<sup>a</sup>*Dipartimento di Chimica, Università di Torino, NIS Centre of Excellence and INSTM Centre of Reference, via Quarellino 15/A, 10135 Torino, Italy*

<sup>b</sup>*(present address) inGAP centre of Research-based Innovation, Department of Chemistry, University of Oslo, Sem Saelandsvei 26, N-0315 Oslo, Norway*

<sup>c</sup>*Department of Chemistry University of California, Berkeley, California 94720, United State*

<sup>d</sup>*Dipartimento di Scienza e Alta Tecnologia, Università dell'Insubria, via Valleggio 11, 22100 Como, Italy*

<sup>e</sup>*(present address) Dipartimento di Chimica, Università degli Studi di Milano, via Golgi 19, 20133 Milano, Italy.*

## Table of Contents

| <b>Content</b>                                                                                                            | <b>Page no.</b> |
|---------------------------------------------------------------------------------------------------------------------------|-----------------|
| Capillary powder X-ray diffraction                                                                                        | 3               |
| PXRD – Confirmation of Stability to Pellet Pressing                                                                       | 4               |
| Sorption measurements                                                                                                     | 5               |
| Table of the calculated and experimental FTIR vibrational frequencies of $\text{Ni}_3(\text{BTP})_2$ and their assignment | 6               |
| References                                                                                                                | 7               |

### Capillary PXRD

The samples were prepared in a controlled atmosphere by first activating  $\text{Ni}_3(\text{BTP})_2$  in the same conditions as in the FTIR measurements and placing the vacuum cell into a glovebox to transfer the powder into 1 mm boron-silicate capillaries. The patterns were collected with a PW3050/60 X'Pert PRO MPD diffractometer from PANalytical working in Debye-Scherrer geometry, using as source the high power ceramic tube PW3373/10 LFF with a Cu anode equipped with Ni filter to attenuate  $K_\beta$  and focused by a PW3152/63 X-ray mirror. Scattered photons were collected by a RTMS (Real Time Multiple Strip) X'celerator detector.

**Figure S1** shows the capillary XRD patterns of  $\text{Ni}_3(\text{BTP})_2$  before and after 573 K activation:

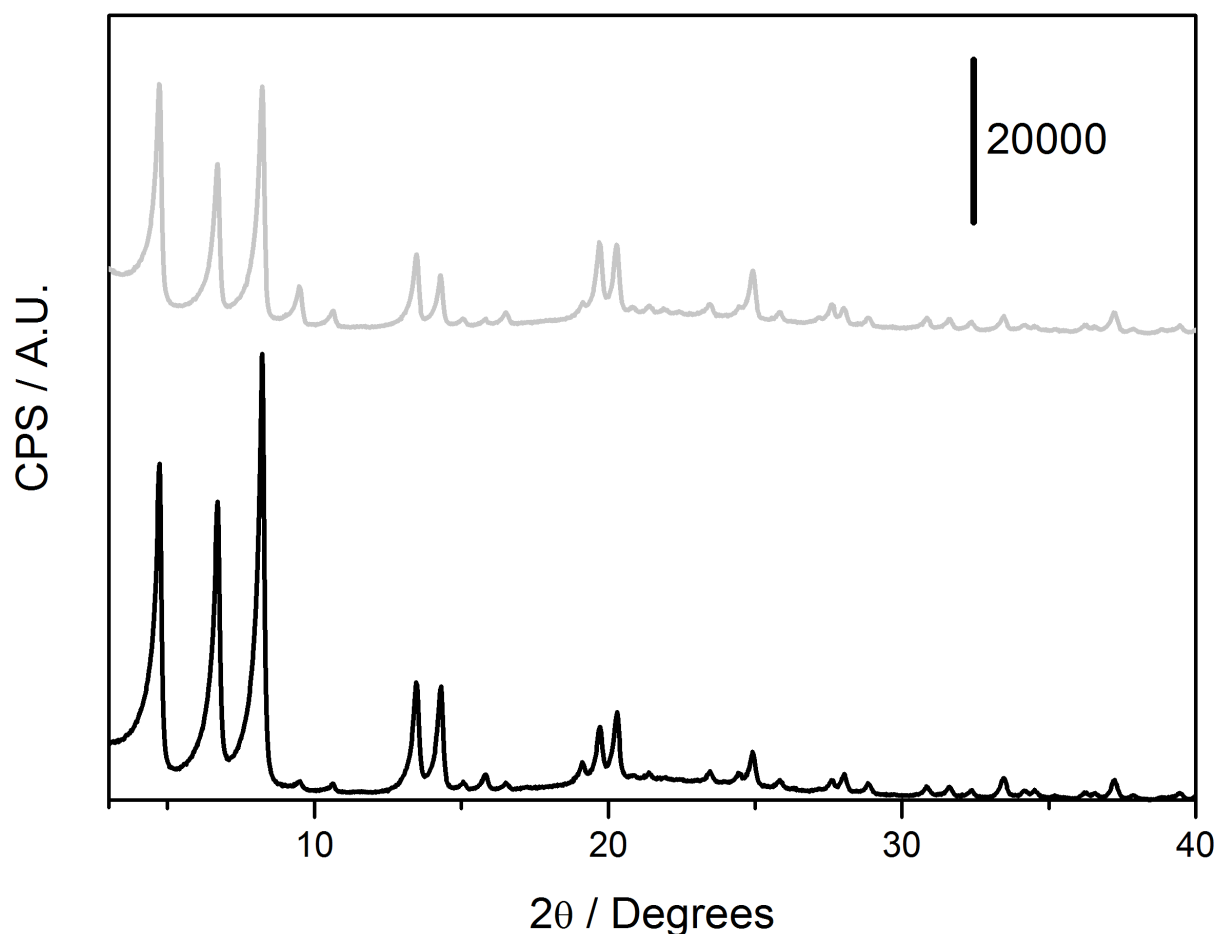

**Figure S1** Capillary PXRD patterns of methanol exchanged  $\text{Ni}_3(\text{BTP})_2$  as synthesised (top, grey) and activated at 573 K for 16 hours (bottom, black).

The figure shows that the patterns are identical with regards to the observed reflections and differ only in their relative intensities. It can therefore be concluded that the material survived the activation temperature of 573 K used throughout the work presented in this paper.

### PXRD – Confirmation of Stability to Pellet Pressing

In order to verify that the structural integrity of  $\text{Ni}_3(\text{BTP})_2$  is maintained when pressed into the self-supporting wafers used for the FTIR measurements, PXRD patterns were recorded before and after utilising a pellet press to apply pressures of up to 5 tons.

**Figure S2** compares the PXRD pattern of as synthesised  $\text{Ni}_3(\text{BTP})_2$  with those recorded after the application of pressures of 1 and 5 tons.

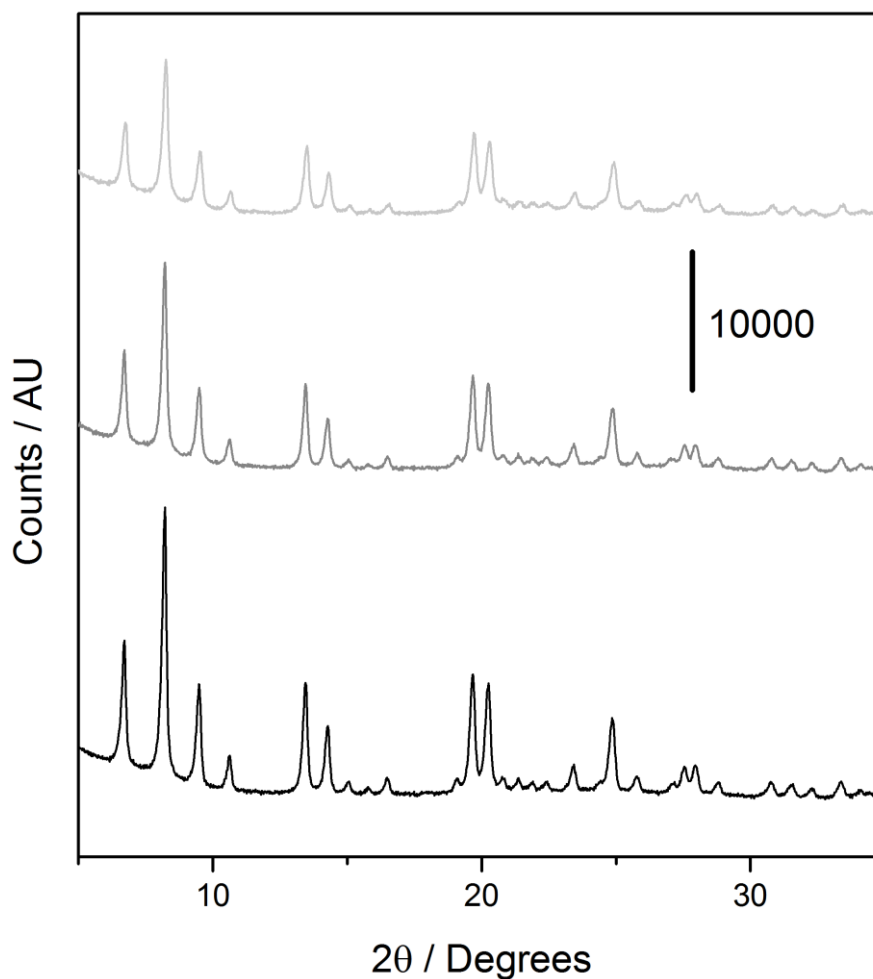

**Figure S2** PXRD patterns of  $\text{Ni}_3(\text{BTP})_2$ : as synthesised (bottom, black); after the application of 1 ton of pressure (middle, dark grey); and after the application of 5 tons of pressure (top, light grey) .

The figure shows that all patterns are identical with regards to the observed reflections and differ only slightly in their relative intensities. It can therefore be concluded that  $\text{Ni}_3(\text{BTP})_2$  maintains its structural integrity when pressed into the self-supporting wafers on which the FTIR measurements were made.

### Sorption measurements:

Surface area, pore volume and pore size distribution were obtained by N<sub>2</sub> adsorption measurements carried out at 77 K on a Micromeritics ASAP 2020 sorption analyzer. The specific surface area of the materials were calculated using the Brunauer–Emmet–Teller (BET) method, while the micropore volume was determined with the t-plot method, adopting the Harkins and Jura equation of thickness.

**Table S1** Shows a comparison of the results of surface area, pore volume, and pore size distribution measurements performed on Ni<sub>3</sub>(BTP)<sub>2</sub> when activated overnight at 573 K as opposed to the temperature of 523 K recommended by Long et al.<sup>1</sup> The results compared are the calculated BET and Langmuir surface areas as well as the micropore surface area and volumes of the two samples.

**Table S1:** Surface area (m<sup>2</sup> g<sup>-1</sup>) and pore volumes (cm<sup>3</sup> g<sup>-1</sup>) of Ni<sub>3</sub>(BTP)<sub>2</sub> activated at 523 and 575 K

|       | $S_{\text{BET}}^a$ | $S_{\text{Lang}}^a$ | $S_{\text{micro}}^b$ | $V_{\text{micro}}^c$ |
|-------|--------------------|---------------------|----------------------|----------------------|
| 523 K | 1026               | 1362                | 940                  | 0.44                 |
| 573 K | 1024               | 1359                | 939                  | 0.44                 |

<sup>a</sup>Total area evaluated following the BET model in the standard  $0.05 < P/P_0 < 0.25$  pressure range.

<sup>c</sup>Micropore surface area and volume obtained from the t-plot. The micropore area is evaluated considering  $S_{\text{BET}}$  as the surface area of the material.

These results show that neither the surface area nor micropore volume of the material was affected when activating at 300 °C rather than the recommended 523 K. Combined with the capillary XRD measurements, it is confirmed that activating Ni<sub>3</sub>(BTP)<sub>2</sub> at 573 K rather than 523 K does not impact the structural integrity of the material and that it also maintains its microporosity.

**Table S2:** Calculated and experimental IR active vibrational frequencies ( $\text{cm}^{-1}$ ) of  $\text{Ni}_3(\text{BTP})_2$  in the 1600-600  $\text{cm}^{-1}$  range with description of the normal modes.

| Exp  | Calc        | Description                                                          |
|------|-------------|----------------------------------------------------------------------|
| 462  | 452 (464)   | N-Ni-N bend in plane                                                 |
| 496  | 488 (500)   | Ni-N asym stretch                                                    |
| 632  | 627 (643)   | C-C-C bending inter-ring                                             |
| 678  | 671 (688)   | C-C-C bend op <sup>b</sup> out of plane phenylic                     |
| 762  | 756 (775)   | C-C-C bend op <sup>b</sup> in plane phenylic                         |
| 857  | 833 (854)   | C-H bend ip pyrazolic and bend ip <sup>a</sup> phenylic out of plane |
| 1017 | 1011 (1037) | Ring deformation in plane pyrazolic                                  |
| 1075 | 1078 (1106) | N-C-H bend ip <sup>a</sup> in plane                                  |
| 1135 | 1134 (1163) | H-C-C bend ip <sup>a</sup> in plane phenylic                         |
| 1188 | 1195 (1226) | N-C-H bending op <sup>b</sup> in plane                               |
| 1253 | 1257 (1289) | N-N stretch + C-H bend in plane                                      |
| 1329 | 1326 (1360) | C-N sym stretch                                                      |
| 1358 | 1354 (1389) | C-C symm Stretch + C-N asymm stretch                                 |
| 1402 | 1406 (1442) | C-N asymm stretch                                                    |
| 1556 | 1553 (1593) | C-C stretch inter-ring                                               |
| 1598 | 1598 (1639) | Ring deformation in plane phenylic                                   |

<sup>a</sup> ip = In phase

<sup>b</sup> op = Out of phase

## References

1. V. Colombo, S. Galli, H. J. Choi, G. D. Han, A. Maspero, G. Palmisano, N. Masciocchi and J. R. Long, *Chem. Sci.*, 2011, **2**, 1311-1319.
